# Supplementary material for: Comparative Analysis of Membrane Vesicles from Three Piscirickettsia salmonis Isolates Reveals Differences in Vesicle Characteristics
Source: PLOS journal article supplement (doi:10.1371/journal.pone.0165099), 2016-10-20
Supplement: S9 (10.1371/journal.pone.0165099.s009) [file journal.pone.0165099.s009]

**S4 Table. Proteins identified in *Piscirickettsia salmonis* NVI 5892 MVs analyzed by mass spectrometry**

| Proteins Identified in <i>Piscirickettsia salmonis</i> strain NVI 5892 MVs |                         |                 |            |                                               |                               |
|----------------------------------------------------------------------------|-------------------------|-----------------|------------|-----------------------------------------------|-------------------------------|
| Protein                                                                    | Total number of spectra | Protein product | Gene locus | Predicted subcellular location                | Putative function             |
| Putative uncharacterized protein                                           | 171                     | ERL61815.1      | K661_01832 | Extracellular                                 | Unknown                       |
| Peptidyl-prolyl cis-trans isomerase                                        | 140                     | ERL62123.1      | K661_01513 | Unknown/<br>multiple<br>localization<br>sites | Protein folding               |
| Outer membrane beta-barrel domain protein                                  | 104                     | ERL63261.1      | K661_00363 | Outer membrane                                | Unknown                       |
| Outer membrane protein assembly factor BamA                                | 89                      | ERL63467.1      | K661_00144 | Outer membrane                                | Unknown                       |
| Prolyl oligopeptidase family protein                                       | 83                      | ERL60791.1      | K661_02889 | Unknown/<br>multiple<br>localization<br>sites | Peptidase activity            |
| Type I secretion outer membrane, TolC family protein                       | 82                      | ERL62298.1      | K661_01343 | Outer membrane                                | Transporter activity          |
| Outer membrane family protein                                              | 79                      | ERL63478.1      | K661_00143 | Unknown                                       | Unknown                       |
| Chaperone protein DnaK                                                     | 74                      | ERL62498.1      | K661_01147 | Cytoplasmic                                   | Protein folding               |
| SH3 domain of the SH3b1 type family protein                                | 72                      | ERL63011.1      | K661_00616 | Cytoplasmic membrane                          | Unknown                       |
| Conjugal transfer family protein                                           | 71                      | ERL63157.1      | K661_00475 | Unknown                                       | Transporter activity          |
| OmpA family protein                                                        | 68                      | ERL63431.1      | K661_00179 | Outer membrane                                | Porin activity                |
| Outer membrane protein assembly factor BamD                                | 64                      | ERL61949.1      | K661_01702 | Outer membrane                                | Outer membrane assembly       |
| Bacterial DNA-binding family protein                                       | 62                      | ERL63373.1      | K661_00235 | Unknown                                       | Translation/<br>transcription |
| Conjugal transfer/type IV secretion DotA/TraY family protein               | 61                      | ERL62906.1      | K661_00735 | Cytoplasmic membrane                          | Unknown                       |
| Glycerophosphoryl diester phosphodiesterase family protein                 | 57                      | ERL63010.1      | K661_00612 | Unknown/<br>multiple<br>localization<br>sites | Enzymatic activity            |
| 50S ribosomal protein L2                                                   | 57                      | ERL63107.1      | K661_00512 | Cytoplasmic                                   | Translation/<br>transcription |
| 30s ribosomal protein S1                                                   | 55                      | ERL61835.1      | K661_01816 | Cytoplasmic                                   | Translation/<br>transcription |
| Putative uncharacterized protein                                           | 52                      | ERL60989.1      | K661_02693 | Unknown                                       | Unknown                       |
| ostA-like family protein                                                   | 48                      | ERL62408.1      | K661_01227 | Outer membrane                                | Transporter activity          |
| DSBA-like thioredoxin                                                      | 46                      | ERL62050.1      | K661_01601 | Unknown                                       | Unknown                       |

|                                                                 |    |            |            |                                     |                           |
|-----------------------------------------------------------------|----|------------|------------|-------------------------------------|---------------------------|
| domain protein                                                  |    |            |            |                                     |                           |
| ATP synthase subunit alpha                                      | 46 | ERL63511.1 | K661_00081 | Cytoplasmic                         | Transporter activity      |
| Type I secretion outer membrane, TolC family protein            | 45 | ERL62558.1 | K661_01078 | Outer membrane                      | Transporter activity      |
| Putative uncharacterized protein                                | 44 | ERL62717.1 | K661_00911 | Unknown                             | Unknown                   |
| Outer membrane protein assembly factor BamB                     | 43 | ERL63452.1 | K661_00202 | Outer membrane                      | Outer membrane assembly   |
| Gamma-glutamyltransferase                                       | 43 | ERL60775.1 | K661_02905 | Periplasmic                         | Enzymatic activity        |
| SurA N-terminal domain protein                                  | 42 | ERL62410.1 | K661_01228 | Periplasmic                         | Protein folding           |
| 50S ribosomal protein L3                                        | 40 | ERL63126.1 | K661_00509 | Cytoplasmic                         | Translation/transcription |
| Site-determining protein                                        | 39 | ERL63059.1 | K661_00595 | Cytoplasmic                         | Enzymatic activity        |
| Translation elongation factor Tu                                | 36 | ERL63123.1 | K661_00507 | Cytoplasmic                         | Translation/transcription |
| Bacterial conjugation TrbI-like family protein                  | 36 | ERL62888.1 | K661_00750 | Unknown                             | Transporter activity      |
| Peptidase Do family protein                                     | 34 | ERL61942.1 | K661_01712 | Periplasmic                         | Peptidase activity        |
| Chaperone protein HtpG                                          | 34 | ERL63045.1 | K661_00577 | Cytoplasmic                         | Protein folding           |
| Succinyl-CoA synthetase subunit beta                            | 33 | ERL62630.1 | K661_00993 | Cytoplasmic                         | Enzymatic activity        |
| Toluene tolerance, Ttg2 family protein                          | 30 | ERL63329.1 | K661_00270 | Unknown                             | Outer membrane assembly   |
| 30S ribosomal protein S5                                        | 30 | ERL63128.1 | K661_00526 | Cytoplasmic                         | Translation/transcription |
| 60kDa chaperonin GroEL                                          | 30 | ERL63008.1 | K661_00639 | Cytoplasmic                         | Protein folding           |
| Cadmium carbonic anhydrase repeat family protein                | 30 | ERL60930.1 | K661_02748 | Unknown                             | Unknown                   |
| Putative uncharacterized protein                                | 26 | ERL61555.1 | K661_02103 | Unknown                             | Unknown                   |
| Efflux transporter, RND family, MFP subunit                     | 26 | ERL61814.1 | K661_01835 | Cytoplasmic membrane                | Transporter activity      |
| PLD-like domain protein                                         | 26 | ERL62649.1 | K661_00979 | Unknown                             | Enzymatic activity        |
| Acetyl-coenzyme A carboxylase carboxyl transferase subunit beta | 25 | ERL62252.1 | K661_01385 | Cytoplasmic                         | Enzymatic activity        |
| VacJ like lipofamily protein                                    | 25 | ERL63561.1 | K661_00057 | Unknown/multiple localization sites | Unknown                   |
| Putative lipoprotein                                            | 24 | ERL61739.1 | K661_01913 | Cytoplasmic membrane                | Unknown                   |
| 30S ribosomal protein S10                                       | 24 | ERL63124.1 | K661_00508 | Cytoplasmic                         | Translation/transcription |
| Protein QmcA                                                    | 23 | ERL61641.1 | K661_02010 | Cytoplasmic                         | Outer membrane assembly   |
| Putative dotC-like type IV secretion system protein             | 22 | ERL62897.1 | K661_00745 | Unknown                             | Unknown                   |
| DNA translocase ftsK                                            | 22 | ERL61259.1 | K661_02403 | Cytoplasmic membrane                | Translation/transcription |
| HflK protein                                                    | 21 | ERL63020.1 | K661_00608 | Unknown                             | Outer membrane assembly   |
| Phospholipase A1 family protein                                 | 21 | ERL62999.1 | K661_00642 | Outer membrane                      | Phospholipase activity    |
| SurA N-terminal domain                                          | 20 | ERL63206.1 | K661_00419 | Unknown/                            | Protein folding           |

| protein                                                              |    |            |            | multiple localization sites             |                               |
|----------------------------------------------------------------------|----|------------|------------|-----------------------------------------|-------------------------------|
| Transketolase                                                        | 19 | ERL62694.1 | K661_00946 | Cytoplasmic                             | Enzymatic activity            |
| D-alanyl-D-alanine carboxypeptidase family protein                   | 19 | ERL63219.1 | K661_00410 | Cytoplasmic membrane                    | Enzymatic activity            |
| D-alanyl-D-alanine carboxypeptidase/D-alanyl-D-alanine-endopeptidase | 19 | ERL62612.1 | K661_01018 | Periplasmic                             | Enzymatic activity            |
| tol-Pal system beta propeller repeat protein TolB                    | 18 | ERL63447.1 | K661_00180 | Periplasmic                             | Transporter activity          |
| Acetyl-coenzyme A carboxylase carboxyl transferase subunit alpha     | 18 | ERL63463.1 | K661_00136 | Cytoplasmic                             | Enzymatic activity            |
| TPR repeat family protein                                            | 18 | ERL63572.1 | K661_00047 | Unknown                                 | Unknown                       |
| Polysaccharide biosynthesis/export family protein                    | 18 | ERL63275.1 | K661_00379 | Unknown/<br>multiple localization sites | Transporter activity          |
| Heme ABC exporter, ATP-binding protein CcmA                          | 17 | ERL62004.1 | K661_01637 | Cytoplasmic                             | Transporter activity          |
| Preprotein translocase, YajC subunit                                 | 17 | ERL62915.1 | K661_00713 | Cytoplasmic membrane                    | Unknown                       |
| Protein HflC                                                         | 17 | ERL63022.1 | K661_00607 | Unknown                                 | Peptidase activity            |
| 30S ribosomal protein S4                                             | 16 | ERL63092.1 | K661_00533 | Cytoplasmic                             | Translation/<br>transcription |
| 30S ribosomal protein S2                                             | 16 | ERL63483.1 | K661_00158 | Cytoplasmic                             | Translation/<br>transcription |
| 30S ribosomal protein S11                                            | 15 | ERL63094.1 | K661_00532 | Cytoplasmic                             | Translation/<br>transcription |
| 30S ribosomal protein S3                                             | 15 | ERL63101.1 | K661_00515 | Cytoplasmic                             | Translation/<br>transcription |
| 30S ribosomal protein S12                                            | 15 | ERL63129.1 | K661_00504 | Cytoplasmic                             | Translation/<br>transcription |
| Polyribonucleotide nucleotidyltransferase                            | 14 | ERL63591.1 | K661_00035 | Cytoplasmic                             | Enzymatic activity            |
| 30S ribosomal protein S6                                             | 14 | ERL63391.1 | K661_00227 | Cytoplasmic                             | Translation/<br>transcription |
| Spore coat assembly SafA domain protein                              | 14 | ERL63078.1 | K661_00541 | Unknown                                 | Enzymatic activity            |
| 30S ribosomal protein S7                                             | 14 | ERL63096.1 | K661_00505 | Cytoplasmic                             | Translation/<br>transcription |
| 30S ribosomal protein S14                                            | 14 | ERL63095.1 | K661_00522 | Cytoplasmic                             | Translation/<br>transcription |
| 30S ribosomal protein S13                                            | 14 | ERL63109.1 | K661_00531 | Cytoplasmic                             | Translation/<br>transcription |
| Putative lipoprotein                                                 | 14 | ERL62971.1 | K661_00658 | Unknown                                 | Unknown                       |
| Cytochrome o ubiquinol oxidase, subunit I                            | 14 | ERL61528.1 | K661_02130 | Cytoplasmic membrane                    | Enzymatic activity            |
| Thioredoxin family protein                                           | 13 | ERL62966.1 | K661_00669 | Periplasmic                             | Unknown                       |
| 50S ribosomal protein L16                                            | 13 | ERL63097.1 | K661_00516 | Cytoplasmic                             | Translation/<br>transcription |
| Membrane protein insertase YidC                                      | 13 | ERL63499.1 | K661_00092 | Cytoplasmic membrane                    | Transporter activity          |
| Succinate dehydrogenase, flavoprotein subunit                        | 12 | ERL62641.1 | K661_00997 | Cytoplasmic membrane                    | Electron transport chain      |

|                                                                           |    |            |            |                                         |                               |
|---------------------------------------------------------------------------|----|------------|------------|-----------------------------------------|-------------------------------|
| 50S ribosomal protein L9                                                  | 12 | ERL63394.1 | K661_00229 | Cytoplasmic                             | Translation/<br>transcription |
| Putative lipoprotein                                                      | 12 | ERL61947.1 | K661_01699 | Unknown                                 | Unknown                       |
| Efflux transporter, RND family, MFP subunit                               | 12 | ERL63225.1 | K661_00385 | Cytoplasmic membrane                    | Transporter activity          |
| MMPL family protein                                                       | 12 | ERL61816.1 | K661_01834 | Cytoplasmic membrane                    | Transporter activity          |
| Putative uncharacterized protein                                          | 11 | ERL61817.1 | K661_01838 | Unknown                                 | Unknown                       |
| Bacterial conjugation TrbI-like family protein                            | 11 | ERL63138.1 | K661_00474 | Unknown                                 | Unknown                       |
| Putative uncharacterized protein                                          | 11 | ERL63074.1 | K661_00568 | Unknown                                 | Unknown                       |
| 50S ribosomal protein L4                                                  | 11 | ERL63099.1 | K661_00510 | Cytoplasmic                             | Translation/<br>transcription |
| 50S ribosomal protein L5                                                  | 11 | ERL63125.1 | K661_00521 | Cytoplasmic                             | Translation/<br>transcription |
| 50S ribosomal protein L24                                                 | 11 | ERL63098.1 | K661_00520 | Cytoplasmic                             | Translation/<br>transcription |
| Dihydrodipicolinate synthase                                              | 11 | ERL61513.1 | K661_02147 | Cytoplasmic                             | Enzymatic activity            |
| Outer membrane protein assembly factor BamE                               | 11 | ERL63567.1 | K661_00069 | Outer membrane                          | Outer membrane assembly       |
| Macrophage killing with similarity to conjugation family protein          | 10 | ERL62896.1 | K661_00732 | Unknown                                 | Unknown                       |
| Acetyl-CoA C-acetyltransferase family protein                             | 10 | ERL63594.1 | K661_00043 | Cytoplasmic                             | Enzymatic activity            |
| 50S ribosomal protein L7/L12                                              | 10 | ERL63105.1 | K661_00500 | Unknown/<br>multiple localization sites | Translation/<br>transcription |
| Poly(R)-hydroxyalkanoic acid synthase, class I family protein             | 10 | ERL62445.1 | K661_01203 | Cytoplasmic                             | Transporter activity          |
| NAD-specific glutamate dehydrogenase                                      | 10 | ERL62977.1 | K661_00664 | Cytoplasmic                             | Enzymatic activity            |
| MetA-pathway of phenol degradation family protein                         | 10 | ERL62980.1 | K661_00673 | Unknown                                 | Outer membrane assembly       |
| ATP synthase subunit beta                                                 | 10 | ERL63527.1 | K661_00079 | Cytoplasmic                             | Enzymatic activity            |
| Succinate dehydrogenase and fumarate reductase iron-sulfur family protein | 9  | ERL62631.1 | K661_00996 | Cytoplasmic membrane                    | Enzymatic activity            |
| 50S ribosomal protein L18                                                 | 9  | ERL63121.1 | K661_00525 | Cytoplasmic                             | Translation/<br>transcription |
| Outer membrane family protein                                             | 9  | ERL62624.1 | K661_01016 | Unknown                                 | Unknown                       |
| Succinyl-CoA ligase [ADP-forming] subunit alpha                           | 9  | ERL62635.1 | K661_00992 | Cytoplasmic                             | Enzymatic activity            |
| Transcription termination factor Rho                                      | 9  | ERL62818.1 | K661_00824 | Cytoplasmic                             | Translation/<br>transcription |
| Elongation factor G                                                       | 8  | ERL63100.1 | K661_00506 | Cytoplasmic                             | Enzymatic activity            |
| AAA-like domain protein                                                   | 8  | ERL62889.1 | K661_00737 | Cytoplasmic                             | Unknown                       |
| DNA/RNA non-specific endonuclease family protein                          | 8  | ERL61072.1 | K661_02601 | Extracellular                           | Endonuclease activity         |
| Protein translocase subunit                                               | 8  | ERL63540.1 | K661_00118 | Cytoplasmic                             | Transporter                   |

|                                                                                             |   |            |            |                                               |                                |
|---------------------------------------------------------------------------------------------|---|------------|------------|-----------------------------------------------|--------------------------------|
| SecA                                                                                        |   |            |            |                                               | activity                       |
| Putative uncharacterized protein                                                            | 8 | ERL63263.1 | K661_00353 | Cytoplasmic membrane                          | Unknown                        |
| FMN-dependent dehydrogenase family protein                                                  | 8 | ERL62372.1 | K661_01269 | Unknown/<br>multiple<br>localization<br>sites | Glutamate<br>synthase activity |
| DNA-directed RNA polymerase subunit alpha                                                   | 8 | ERL63103.1 | K661_00534 | Cytoplasmic                                   | Translation/<br>transcription  |
| Protein translocase subunit SecD                                                            | 7 | ERL62918.1 | K661_00714 | Cytoplasmic membrane                          | Transporter<br>activity        |
| Thioredoxin                                                                                 | 7 | ERL62824.1 | K661_00823 | Cytoplasmic                                   | Oxidoreductase<br>activity     |
| TRAP transporter solute receptor, TAXI family protein                                       | 7 | ERL61459.1 | K661_02201 | Unknown                                       | Translation/<br>transcription  |
| Ribose-phosphate pyrophosphokinase                                                          | 7 | ERL62246.1 | K661_01400 | Cytoplasmic                                   | Enzymatic activity             |
| Lipopolysaccharide transport periplasmic protein LptA                                       | 7 | ERL63347.1 | K661_00276 | Unknown                                       | Transporter<br>activity        |
| YGGT family protein                                                                         | 7 | ERL63267.1 | K661_00357 | Cytoplasmic membrane                          | Unknown                        |
| Dihydrolipoyllysine-residue succinyltransferase, E2 component of oxoglutarate dehydrogenase | 7 | ERL62645.1 | K661_00994 | Cytoplasmic                                   | Tricarboxylic acid<br>cycle    |
| AT hook motif family protein                                                                | 7 | ERL60509.1 | K661_03171 | Cytoplasmic                                   | Unknown                        |
| Mce related family protein                                                                  | 7 | ERL63357.1 | K661_00271 | Unknown                                       | Unknown                        |
| 50S ribosomal protein L25                                                                   | 7 | ERL62243.1 | K661_01399 | Cytoplasmic                                   | Translation/<br>transcription  |
| Putative lipoprotein                                                                        | 7 | ERL61463.1 | K661_02203 | Unknown                                       | Unknown                        |
| Putative lipoprotein                                                                        | 7 | ERL62900.1 | K661_00746 | Unknown                                       | Unknown                        |
| 30S ribosomal protein S18                                                                   | 6 | ERL63390.1 | K661_00228 | Cytoplasmic                                   | Translation/<br>transcription  |
| VirB8 family protein                                                                        | 6 | ERL63151.1 | K661_00476 | Unknown                                       | Unknown                        |
| 30S ribosomal protein S19                                                                   | 6 | ERL63122.1 | K661_00513 | Cytoplasmic                                   | Translation/<br>transcription  |
| 50S ribosomal protein L28                                                                   | 6 | ERL62116.1 | K661_01537 | Cytoplasmic                                   | Translation/<br>transcription  |
| ATP synthase F0, B subunit                                                                  | 6 | ERL63538.1 | K661_00083 | Cytoplasmic membrane                          | Enzymatic activity             |
| Superoxide dismutase [Cu-Zn]                                                                | 6 | ERL60975.1 | K661_02704 | Periplasmic                                   | Enzymatic activity             |
| Protein TolQ                                                                                | 6 | ERL63421.1 | K661_00183 | Cytoplasmic membrane                          | Transporter<br>activity        |
| 50S ribosomal protein L15                                                                   | 6 | ERL63112.1 | K661_00528 | Cytoplasmic                                   | Translation/<br>transcription  |
| Alanine dehydrogenase                                                                       | 6 | ERL60806.1 | K661_02874 | Cytoplasmic                                   | Enzymatic activity             |
| Penicillin-binding protein 1B                                                               | 6 | ERL63553.1 | K661_00046 | Cytoplasmic membrane                          | Peptidase activity             |
| Putative lipoprotein                                                                        | 6 | ERL61517.1 | K661_02148 | Unknown                                       | Unknown                        |
| DNA-directed RNA polymerase subunit beta                                                    | 6 | ERL63106.1 | K661_00503 | Cytoplasmic                                   | Translation/<br>transcription  |
| Lytic murein transglycosylase B                                                             | 6 | ERL62468.1 | K661_01166 | Cytoplasmic membrane                          | Transporter<br>activity        |
| BON domain protein                                                                          | 6 | ERL62447.1 | K661_01202 | Unknown/<br>multiple<br>localization<br>sites | Unknown                        |
| Carbon storage regulator                                                                    | 6 | ERL63016.1 | K661_00621 | Unknown/                                      | Enzymatic activity             |

|                                                        |   |            |            | multiple<br>localization<br>sites |                               |
|--------------------------------------------------------|---|------------|------------|-----------------------------------|-------------------------------|
| AhpC/TSA family protein                                | 6 | ERL62427.1 | K661_01215 | Cytoplasmic                       | Antioxidant<br>activity       |
| Cell division protein FtsZ                             | 6 | ERL63530.1 | K661_00116 | Cytoplasmic                       | GTPase activity               |
| DNA-directed RNA<br>polymerase subunit beta            | 6 | ERL63118.1 | K661_00502 | Cytoplasmic                       | Translation/<br>transcription |
| Signal recognition particle<br>protein                 | 6 | ERL62778.1 | K661_00877 | Cytoplasmic<br>membrane           | GTPase activity               |
| ATP-dependent Clp protease<br>ATP-binding subunit ClpX | 6 | ERL63217.1 | K661_00422 | Cytoplasmic                       | Peptidase activity            |
| Tol-pal system protein YbgF                            | 6 | ERL63436.1 | K661_00177 | Unknown                           | Unknown                       |
| Phosphoribosylfor-<br>mylglycinamide cyclo-<br>ligase  | 6 | ERL61959.1 | K661_01687 | Cytoplasmic                       | Enzymatic activity            |
